# Supplementary material
Source: PubMed Central journal article supplement (PMC3760056)
Supplement: Supp_Fig1.pdf [file Supp_Fig1.pdf]

## Supplementary Data

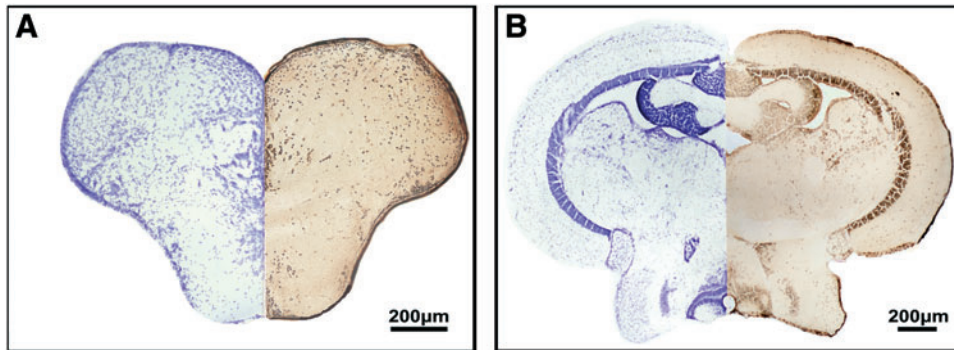

**SUPPLEMENTARY FIG. S1.** Representative matching slices stained by cresyl violet (*left*) and Neo-Timm (*right*). Telencephalon (**A**) and midbrain/diencephalon (**B**).
