# Supplementary material
Source: PubMed Central journal article supplement (PMC3760056)
Supplement: Supp_Fig2.pdf [file Supp_Fig2.pdf]

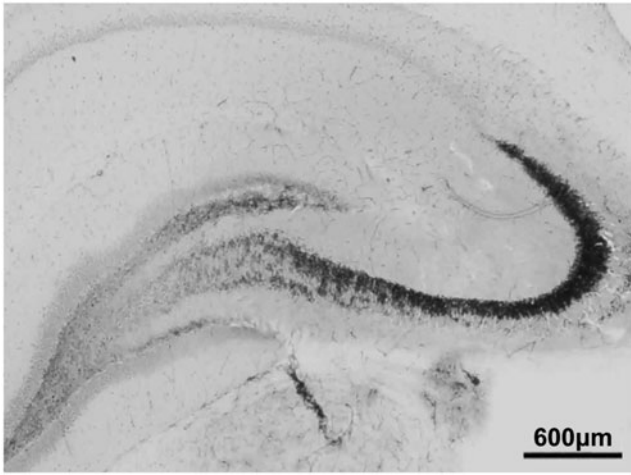

**SUPPLEMENTARY FIG. S2.** Brain slice ( $30\ \mu\text{m}$  thick) of the hippocampus of rat. The slice was stained by Neo-Timm, after immersion in 1% sodium sulfide.
