# Supplementary material
Source: PubMed Central journal article supplement (PMC3760056)
Supplement: Supp_Fig3.pdf [file Supp_Fig3.pdf]

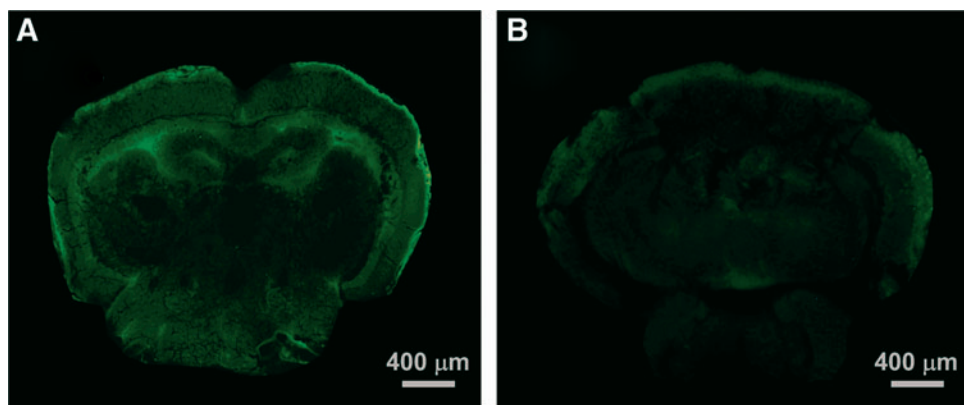

**SUPPLEMENTARY FIG. S3.** Unfixed coronal slices ( $60\ \mu\text{m}$  thick) of optic tectum stained by ZP1 with or without TPEN. Compared to control (A), the previous addition of Zn chelant on central nervous system slice did completely abolish Zn staining revealed by ZP1 (B). The same laser exposure was applied to capture both images.
